# Supplementary material
Source: publisher site journal article supplement (https://www.dovepress.com/article/592917)
Supplement: Supplementary file 1 [file 592917%20Supplementary%20material.pdf]

**Suppl Table 1. Number of animals analyzed per group**

| Experiment                                                                      | I  |    |      |      | II |    |      |       | III |           |          |       |          |
|---------------------------------------------------------------------------------|----|----|------|------|----|----|------|-------|-----|-----------|----------|-------|----------|
|                                                                                 | S  | M  | M+AP | M+CP | S  | M  | M+MC | M+Veh | M   | M + AP+LY | M+AP+Veh | M+Veh | M+740Y-P |
| Neurobehavioral tests<br><i>Figure 1D-I; Figure 3C-H; Figure 5B-G</i>           | 18 | 19 | 19   | 18   | 18 | 19 | 20   | 18    | 18  | 19        | 19       | 20    | 18       |
| H-reflex evaluation<br><i>Figure 1L-N; Figure 3I-K; Figure 5H-J</i>             | 18 | 19 | 19   | 18   | 18 | 19 | 20   | 18    | 18  | 19        | 19       | 20    | 18       |
| TTC staining<br><i>Figure 1J, K</i>                                             | 6  | 6  | 6    | 6    | -  | -  | -    | -     | -   | -         | -        | -     | -        |
| Immunofluorescence<br><i>Figure 2A-H; Figure 4A-H; Figure 6A-D; Figure 7A-D</i> | 6  | 6  | 6    | 6    | 6  | 6  | 6    | 6     | 6   | 6         | 6        | 6     | 6        |
| RT-PCR<br><i>Figure 2P-Q; Figure 4N-O; Figure 7 J-K</i>                         | 6  | 6  | 6    | 6    | 6  | 6  | 6    | 6     | 6   | 6         | 6        | 6     | 6        |
| Western blotting<br><i>Figure 2I-O; Figure 4I-M; Figure 7E-I</i>                | 6  | 6  | 6    | 6    | 6  | 6  | 6    | 6     | 6   | 6         | 6        | 6     | 6        |
| ELISA<br><i>Figure 2R-W; Figure 4P-U; Figure 7L-Q</i>                           | 6  | 6  | 6    | 6    | 6  | 6  | 6    | 6     | 6   | 6         | 6        | 6     | 6        |

S, sham-operated; M, model; AP, acupoint; CP, control non-acupoint; MC, minocycline hydrochloride; Veh, vehicle; LY, LY294002

**Suppl Table 2. The primer sequences for RT-qPCR**

| Gene   | Primer sequence (5'→3') | Reverse primer (5'→3')  |
|--------|-------------------------|-------------------------|
| Fcgr2a | GCTTTTGCAGACAGGCAGAC    | TCACAGTGTCGTCCTTGAGC    |
| Mrc1   | GACTAAGCCAAGGGGCAACC    | GAGTCTCATGGCCAGAGTG     |
| GAPDH  | AAGTTCAACGGCACAGTCAAGG  | GACATACTCAGCACCAGCATCAC |

**Suppl Table 3. Characteristics of the M-Wave and H-Reflex: Latency, Amplitude, and Threshold**

| Group    | Experiment | Motor threshold (mA) | Mmax (mV)       | Hmax (mV)       | M latency (msec) | H latency (msec) | H-reflex threshold ( $\times$ MT) | Hmax ( $\times$ MT) |
|----------|------------|----------------------|-----------------|-----------------|------------------|------------------|-----------------------------------|---------------------|
| S        | I          | 0.20 $\pm$ 0.03      | 6.77 $\pm$ 0.27 | 1.60 $\pm$ 0.11 | 2.69 $\pm$ 0.23  | 9.24 $\pm$ 0.18  | 1.02 $\pm$ 0.14                   | 1.58 $\pm$ 0.15     |
| M        |            | 0.44 $\pm$ 0.04      | 6.39 $\pm$ 0.49 | 4.92 $\pm$ 0.52 | 2.70 $\pm$ 0.22  | 9.26 $\pm$ 0.16  | 1.02 $\pm$ 0.11                   | 1.60 $\pm$ 0.16     |
| M+AP     |            | 0.29 $\pm$ 0.02      | 6.67 $\pm$ 0.34 | 3.79 $\pm$ 0.45 | 2.73 $\pm$ 0.22  | 9.29 $\pm$ 0.21  | 1.05 $\pm$ 0.10                   | 1.61 $\pm$ 0.19     |
| M+CP     |            | 0.42 $\pm$ 0.02      | 6.42 $\pm$ 0.46 | 5.01 $\pm$ 0.25 | 2.72 $\pm$ 0.25  | 9.30 $\pm$ 0.19  | 1.01 $\pm$ 0.12                   | 1.60 $\pm$ 0.18     |
| S        | II         | 0.22 $\pm$ 0.03      | 6.79 $\pm$ 0.26 | 1.61 $\pm$ 0.10 | 2.68 $\pm$ 0.19  | 9.27 $\pm$ 0.14  | 1.04 $\pm$ 0.13                   | 1.60 $\pm$ 0.19     |
| M        |            | 0.42 $\pm$ 0.03      | 6.44 $\pm$ 0.45 | 4.99 $\pm$ 0.54 | 2.70 $\pm$ 0.21  | 9.31 $\pm$ 0.16  | 1.06 $\pm$ 0.15                   | 1.68 $\pm$ 0.18     |
| M+MC     |            | 0.33 $\pm$ 0.02      | 6.70 $\pm$ 0.34 | 3.98 $\pm$ 0.47 | 2.71 $\pm$ 0.22  | 9.34 $\pm$ 0.22  | 1.07 $\pm$ 0.10                   | 1.62 $\pm$ 0.15     |
| M+Veh    |            | 0.43 $\pm$ 0.02      | 6.43 $\pm$ 0.44 | 5.02 $\pm$ 0.27 | 2.72 $\pm$ 0.25  | 9.31 $\pm$ 0.18  | 1.03 $\pm$ 0.09                   | 1.62 $\pm$ 0.18     |
| M        | III        | 0.45 $\pm$ 0.02      | 6.44 $\pm$ 0.42 | 5.16 $\pm$ 0.58 | 2.73 $\pm$ 0.23  | 9.38 $\pm$ 0.18  | 1.14 $\pm$ 0.11                   | 1.75 $\pm$ 0.14     |
| M+AP+LY  |            | 0.36 $\pm$ 0.03      | 6.87 $\pm$ 0.39 | 4.21 $\pm$ 0.48 | 2.75 $\pm$ 0.26  | 9.41 $\pm$ 0.25  | 1.14 $\pm$ 0.11                   | 1.77 $\pm$ 0.19     |
| M+AP+Veh |            | 0.30 $\pm$ 0.02      | 6.60 $\pm$ 0.43 | 3.31 $\pm$ 0.42 | 2.78 $\pm$ 0.22  | 9.43 $\pm$ 0.22  | 1.17 $\pm$ 0.10                   | 1.73 $\pm$ 0.11     |
| M+ Veh   |            | 0.45 $\pm$ 0.03      | 6.49 $\pm$ 0.42 | 5.27 $\pm$ 0.51 | 2.76 $\pm$ 0.24  | 9.42 $\pm$ 0.19  | 1.13 $\pm$ 0.09                   | 1.80 $\pm$ 0.18     |
| M+740Y-P |            | 0.37 $\pm$ 0.02      | 6.75 $\pm$ 0.32 | 3.96 $\pm$ 0.44 | 2.72 $\pm$ 0.20  | 9.41 $\pm$ 0.16  | 1.16 $\pm$ 0.07                   | 1.79 $\pm$ 0.13     |

Data were expressed as mean  $\pm$  SD. S, sham-operated; M, model; AP, acupoint; CP, control non-acupoint; MC, minocycline hydrochloride; Veh, vehicle; LY, LY294002.

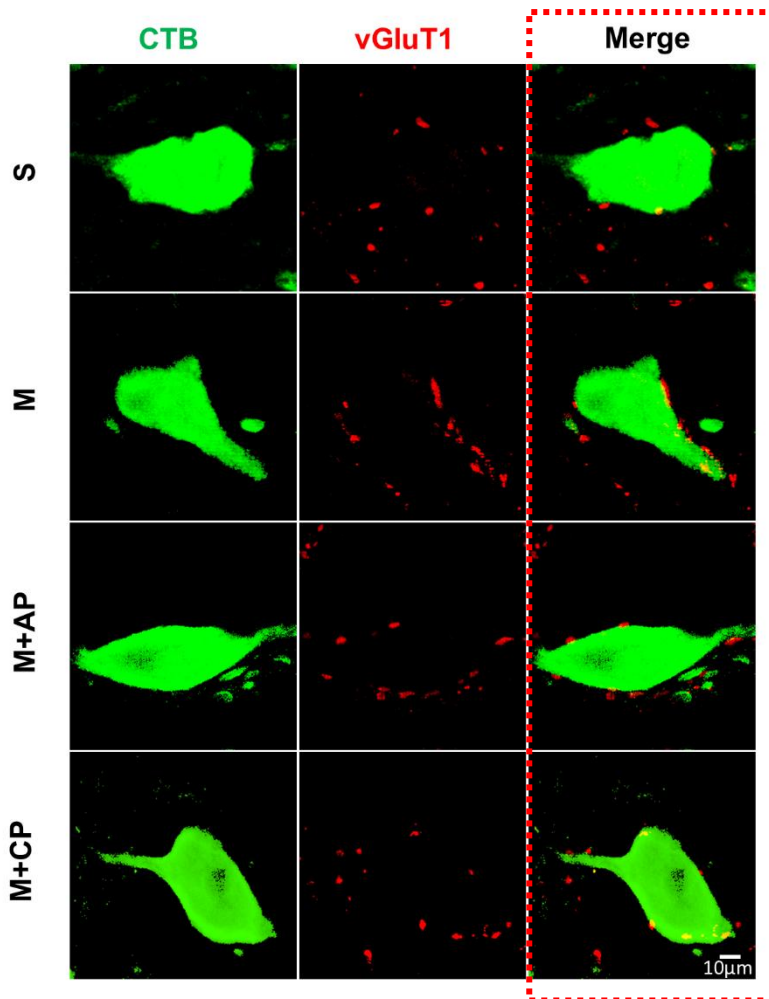

**Suppl Figure 1. Effects of acupuncture on vGluT1 expressions in the spinal cord of MCAO rats with spastic hemiplegia.** Representative images of vGluT1 immunoreactive boutons (marking the proprioceptive terminals, red) on CTB-labeled motor neurons (green); scale bar, 10  $\mu\text{m}$ . S: sham-operated group; M: model group; M+AP: model + acupuncture group; M+CP: model + control point group.

**Note:** The merge image in dashed frame is Figure 2E in main text.

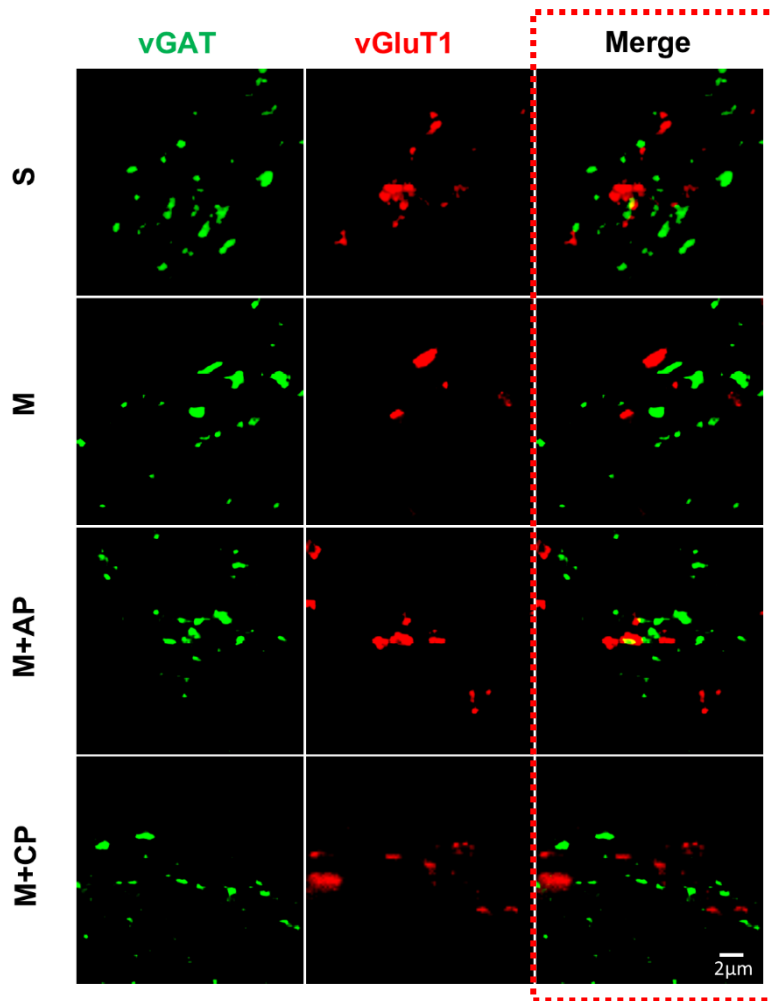

**Suppl Figure 2. Effects of acupuncture on vGluT1 and vGAT expressions and their contacts in the spinal cord of MCAO rats with spastic hemiplegia.** Representative images of vGluT1 boutons (red), vGAT immunoreactive boutons (marking GABAergic synapses, green), and their contacts; scale bar, 2  $\mu$ m. S: sham-operated group; M: model group; M+AP: model + acupuncture group; M+CP: model + control point group.

**Note:** The merge image in dashed frame is Figure 2F in main text.

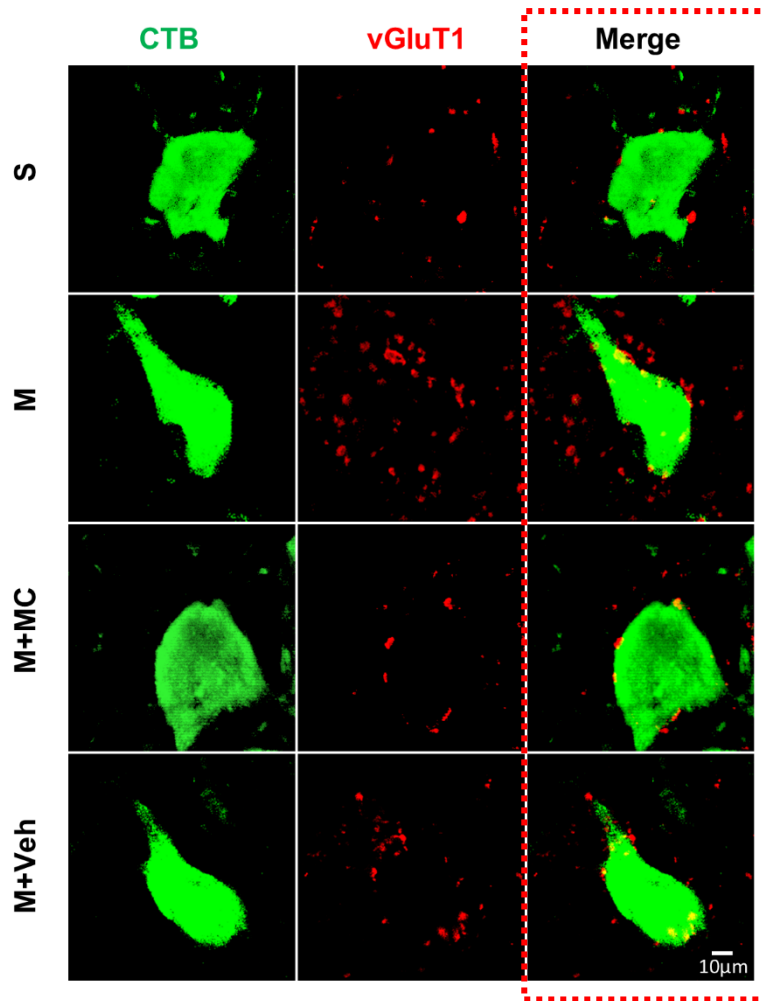

**Suppl Figure 3. Effects of microglia M1 polarization inhibitor on vGluT1 expressions in the spinal cord of MCAO rats with spastic hemiplegia.** Representative images of vGluT1 immunoreactive boutons (marking the proprioceptive terminals, red) on CTB-labeled motor neurons (green); scale bar, 10  $\mu$ m. S: sham-operated group; M: model group; M+MC: model + minocycline hydrochloride group; M+Veh: model + vehicle group.

**Note:** The merge image in dashed frame is Figure 4E in main text.

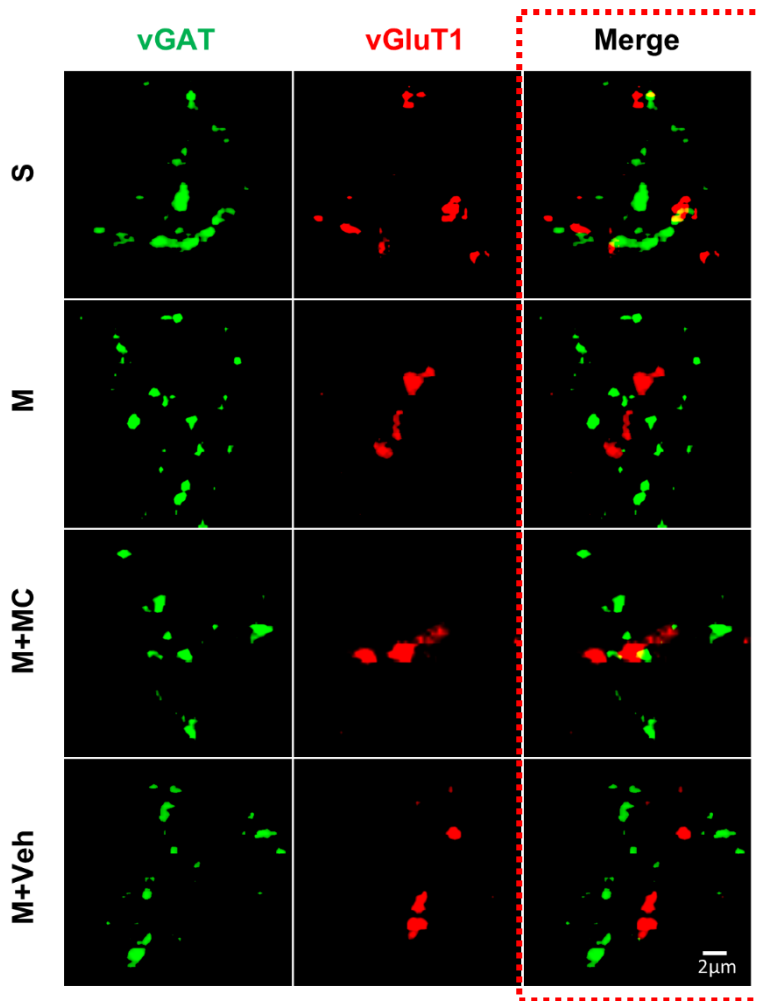

**Suppl Figure 4. Effects of microglia M1 polarization inhibitor on vGluT1 and vGAT expressions and their contacts in the spinal cord of MCAO rats with spastic hemiplegia.** Representative images of vGluT1 boutons (red), vGAT immunoreactive boutons (marking GABAergic synapses, green), and their contacts; scale bar, 2  $\mu$ m. S: sham-operated group; M: model group; M+MC: model + minocycline hydrochloride group; M+Veh: model + vehicle group.

**Note:** The merge image in dashed frame is Figure 4F in main text.

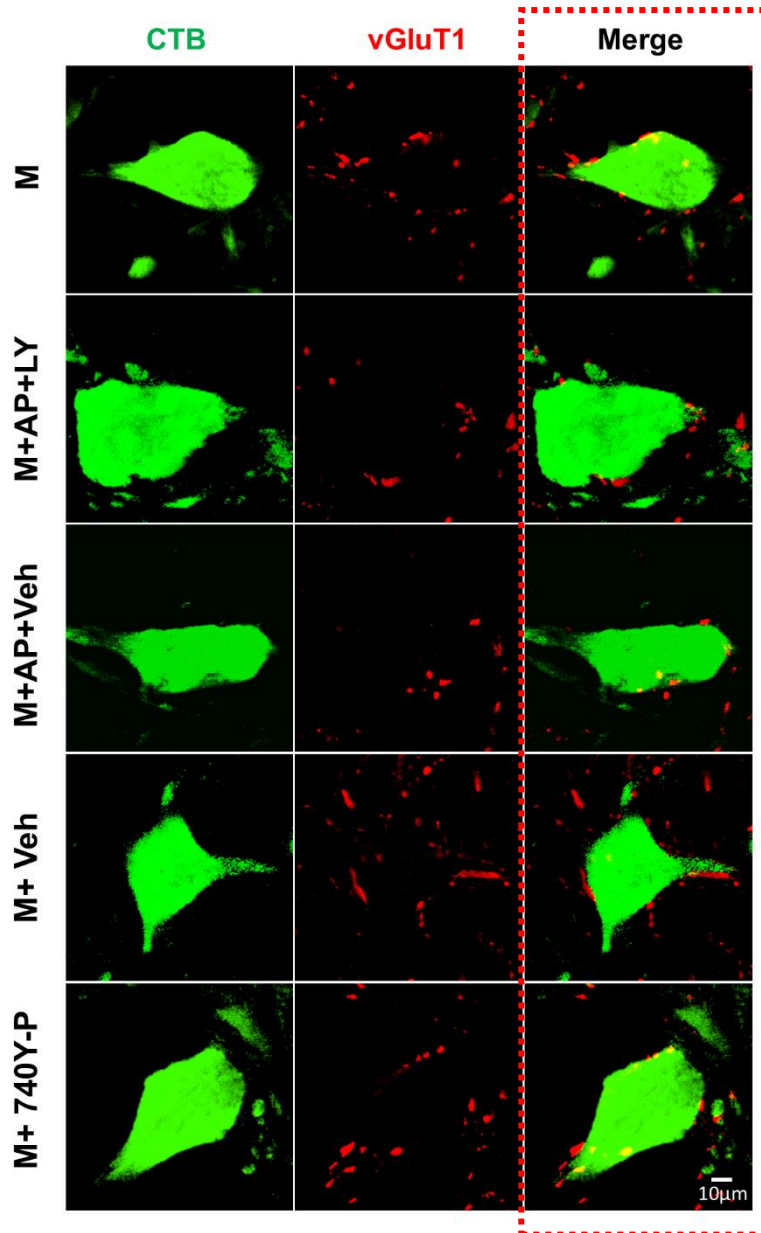

**Suppl Figure 5. Effects of PI3K inhibitor LY294002 (LY) and agonist 740Y-P on vGluT1 expressions in the spinal cord in MCAO rats with spastic hemiplegia.** Representative images of vGluT1 immunoreactive boutons (marking the proprioceptive terminals, red) on CTB-labeled motor neurons (green); scale bar, 10 µm. M: model group; M+AP+LY: model + acupuncture + LY294002 group; M+AP+Veh: model + acupuncture + vehicle; M+Veh: model + vehicle group; M+740Y-P: model + 740Y-P group.

**Note:** The merge image in dashed frame is Figure 7A in main text.

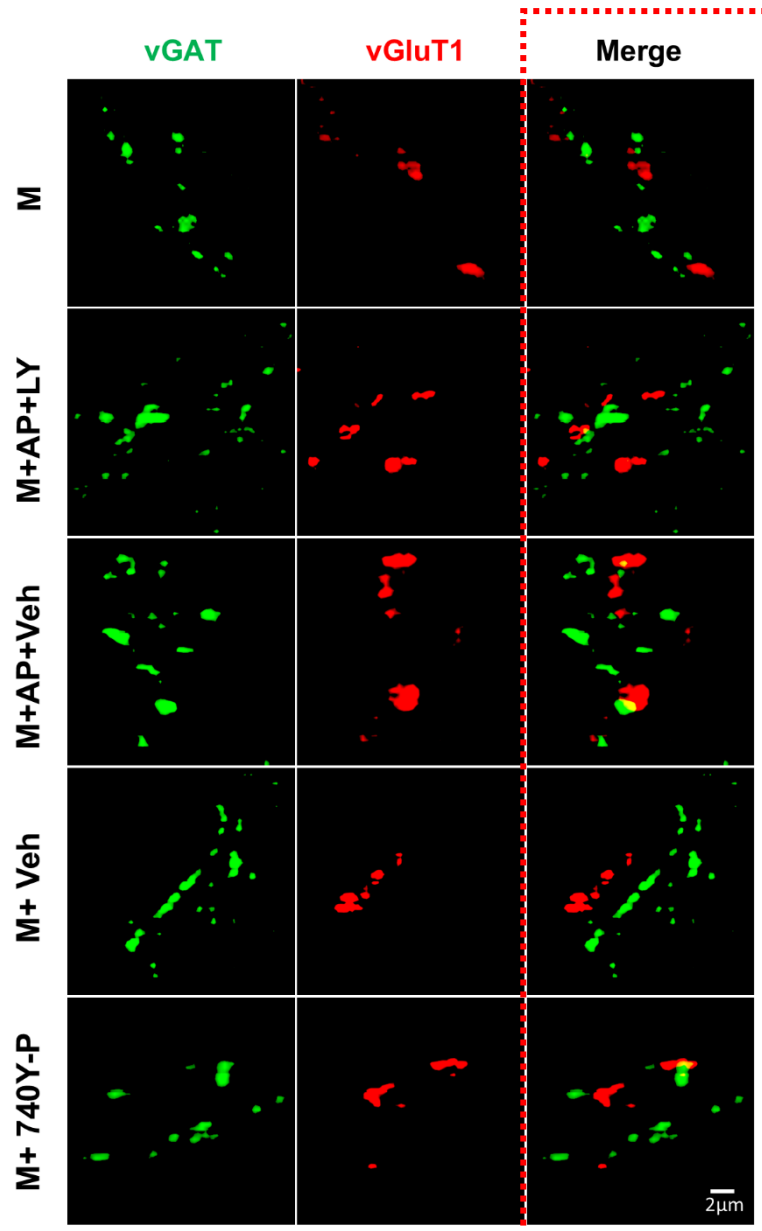

**Suppl Figure 6. Effects of PI3K inhibitor LY294002 (LY) and agonist 740Y-P on vGluT1 and vGAT expressions and their contacts in the spinal cord in MCAO rats with spastic hemiplegia.** Representative images of vGluT1 boutons (red), vGAT immunoreactive boutons (marking GABAergic synapses, green), and their contacts; scale bar, 2 µm. M: model group; M+AP+LY: model + acupuncture + LY294002 group; M+AP+Veh: model + acupuncture + vehicle; M+Veh: model + vehicle group; M+740Y-P: model + 740Y-P group.

**Note:** The merge image in dashed frame is Figure 7B in main text.
